# Supplementary material for: Ytterbium complexes with 2-(tosylamino)-benzylidene-N-(2-halobenzoyl)-hydrazones for solution-processable NIR OLEDs
Source: Royal Society of Chemistry journal article supplement (doi:10.1039/d1tc04600d), 2021-12-02
Supplement: d1tc04600d1.pdf [file d1tc04600d1.pdf]

## Electronic Supporting Information

# Ytterbium complex with 2-(tosylamino)-benzylidene-N-(2-halobenzoyl)-hydrazones for solution-processable NIR OLEDs

Lyubov O. Tcelykh,<sup>a</sup> Andrey A. Vashchenko,<sup>b</sup> Alexey V. Medvedko,<sup>a</sup> Łukasz Marciniak,<sup>c</sup> Alexey E. Aleksandrov,<sup>d</sup> Alexander S. Goloveshkin,<sup>e</sup> Leonid S. Lepnev,<sup>b</sup> Egor V. Latipov,<sup>a</sup> Anatily Burlov,<sup>f</sup> and Valentina V. Utochnikova<sup>\*a</sup>

---

<sup>a</sup>M.V. Lomonosov Moscow State University 1/3 Leninskiye Gory, Moscow, 119991, Russia

<sup>b</sup>P.N. Lebedev Physical Institute Leninsky prosp. 53, Moscow, 119992, Russia

<sup>c</sup>Institute of Low Temperature and Structure Research, Polish Academy of Sciences, 1410, 50-950 Wrocław 2, Poland

<sup>d</sup>A.N. Frumkin Institute of Physical Chemistry and Electrochemistry, Leninsky prosp. 31, bld. 4, Moscow, 119071, Russia

<sup>e</sup>A.N. Nesmeyanov Institute of Organoelement Compounds, Vavilova St. 28, Moscow, 119334, Russia

<sup>f</sup>South Federal University, Rostov-on-Don, Russia

## Contents

|                               |    |
|-------------------------------|----|
| XRD data .....                | 2  |
| IR spectroscopy data .....    | 5  |
| TGA data .....                | 7  |
| Photophysical properties..... | 9  |
| NMR data.....                 | 12 |
| Mass-spectroscopy data.....   | 24 |

# XRD data

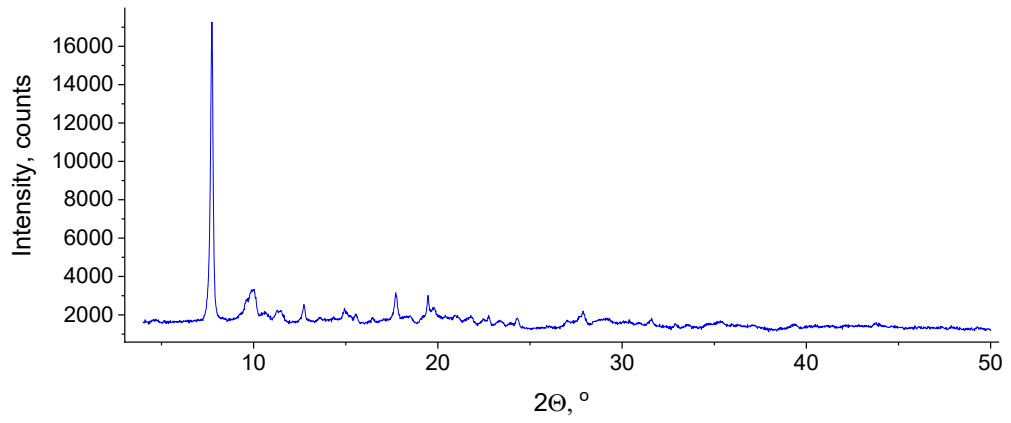

a)

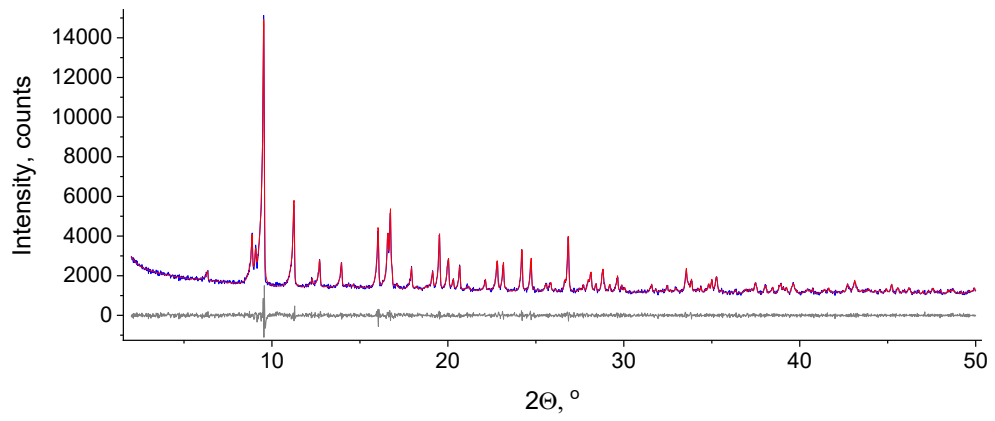

b)

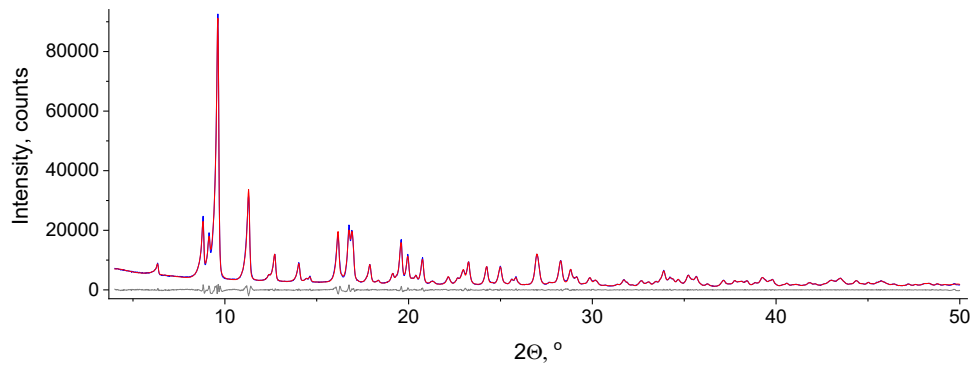

c)

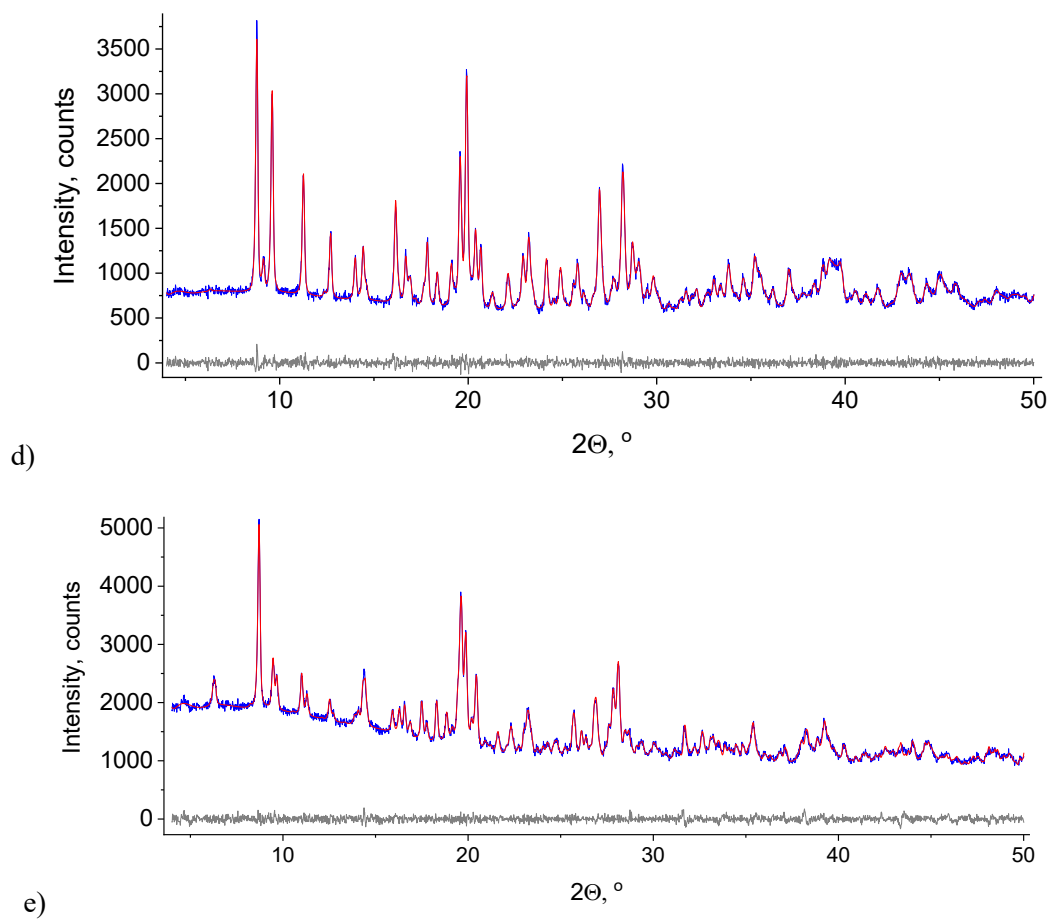

**Figure S1.** PXRD patterns of a)  $\text{Yb}(\text{L}^{\text{F}})(\text{HL}^{\text{F}})$ , b)  $\text{Gd}(\text{L}^{\text{Cl}})(\text{HL}^{\text{Cl}})$ , c)  $\text{Yb}(\text{L}^{\text{Cl}})(\text{HL}^{\text{Cl}})$ , d)  $\text{Yb}(\text{L}^{\text{Br}})(\text{HBr})$ , e)  $\text{Yb}(\text{L}^{\text{I}})(\text{HI})$ : experimental curve (blue), fitting curve (red), difference (grey).

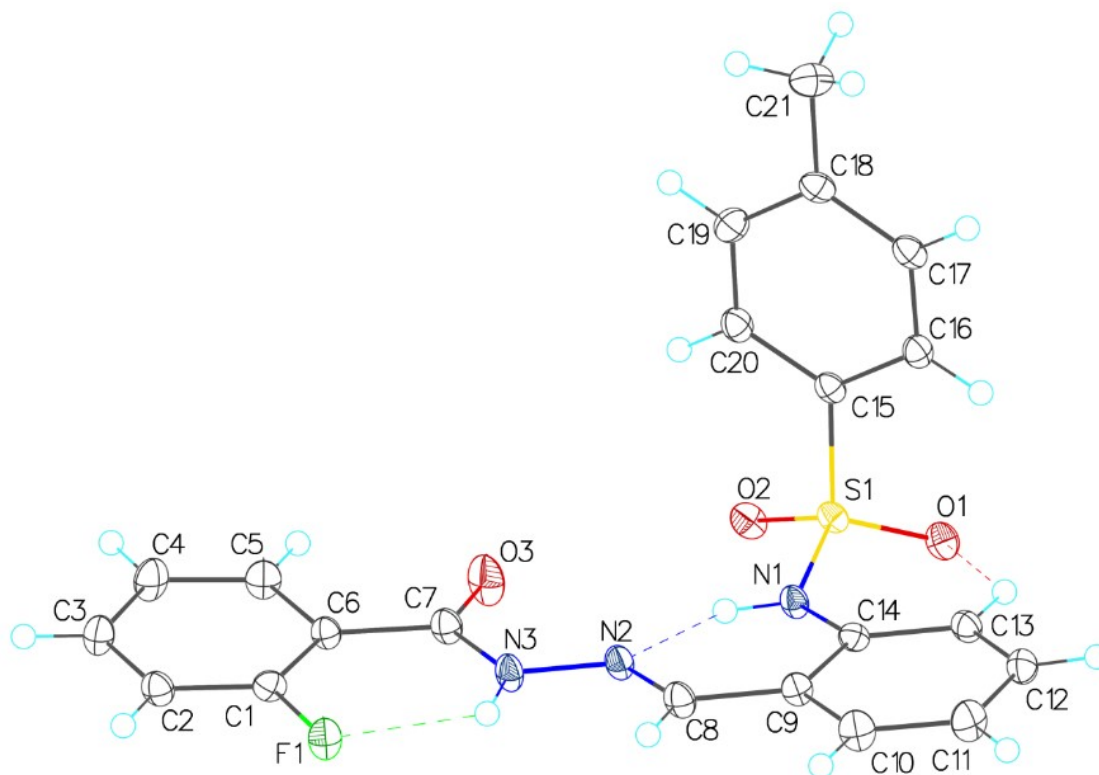

**Figure S2.** The single-crystal X-ray structure of  $\text{H}_2\text{L}^{\text{F}}$ , atoms are represented by thermal displacement ellipsoids ( $p=50\%$ ).

**Crystal Data** for  $\text{C}_{21}\text{H}_{18}\text{FN}_3\text{O}_3\text{S}$  ( $M = 411.44$  g/mol): triclinic, space group P-1 (no. 2),  $a = 8.2778(15)$  Å,  $b = 10.4591(19)$  Å,  $c = 11.303(3)$  Å,  $\alpha = 108.611(3)^\circ$ ,  $\beta = 93.498(5)^\circ$ ,  $\gamma = 94.266(4)^\circ$ ,  $V = 921.1(3)$  Å<sup>3</sup>,  $Z = 2$ ,  $T = 120$  K,  $\mu(\text{MoK}\alpha) = 0.216$  mm<sup>-1</sup>,  $D_{\text{calc}} = 1.483$  g/cm<sup>3</sup>, 12341 reflections measured ( $3.82^\circ \leq 2\theta \leq 61.34^\circ$ ), 5653 unique ( $R_{\text{int}} = 0.0726$ ,  $R_{\text{sigma}} = 0.0661$ ) which were used in all calculations. The final  $R_1$  was 0.0500 ( $>2\sigma(I)$ ) and  $wR_2$  was 0.1433 (all data).

# IR spectroscopy data

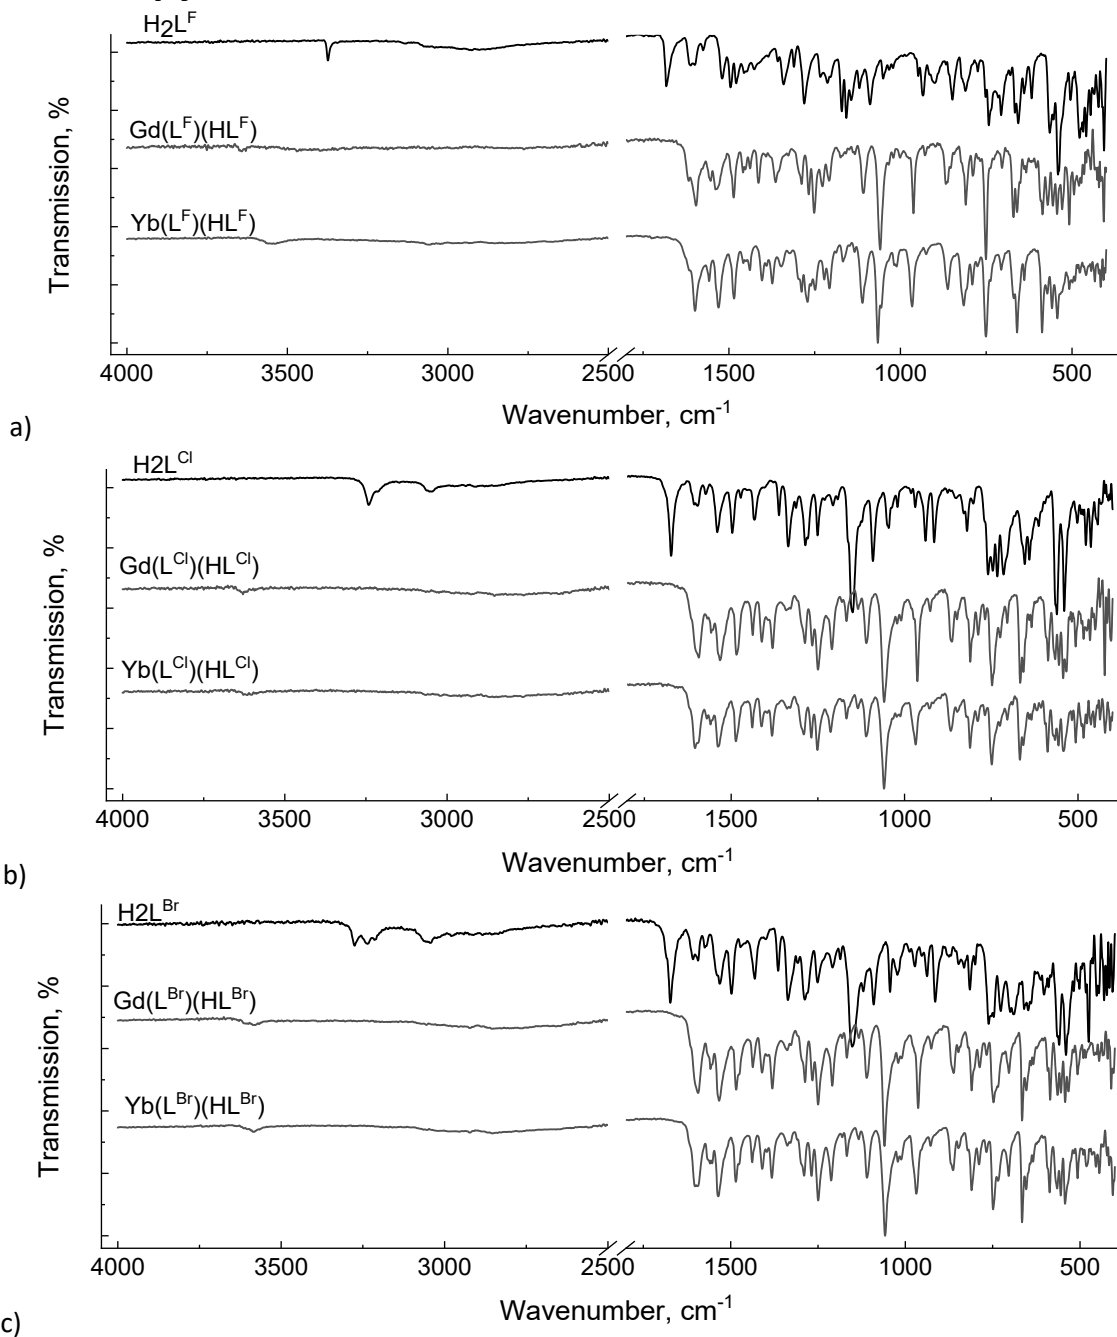

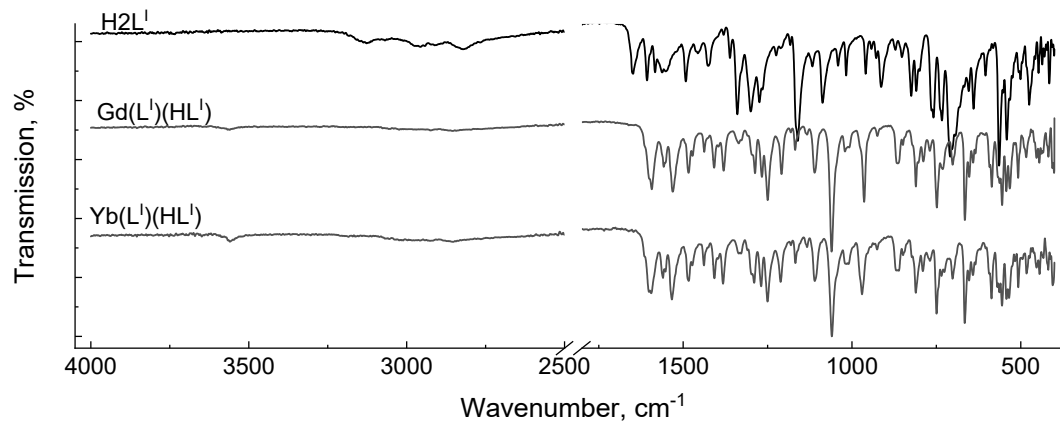

**Figure S3.** IR spectra of a)  $\text{H}_2\text{L}^{\text{F}}$  (1),  $\text{Gd}(\text{L}^{\text{F}})(\text{HL}^{\text{F}})$  (2),  $\text{Yb}(\text{L}^{\text{F}})(\text{HL}^{\text{F}})$  (3); b)  $\text{H}_2\text{L}^{\text{Cl}}$  (1),  $\text{Gd}(\text{L}^{\text{Cl}})(\text{HL}^{\text{Cl}})$  (2),  $\text{Yb}(\text{L}^{\text{Cl}})(\text{HL}^{\text{Cl}})$  (3); c)  $\text{H}_2\text{L}^{\text{Br}}$  (1),  $\text{Gd}(\text{L}^{\text{Br}})(\text{HL}^{\text{Br}})$  (2),  $\text{Yb}(\text{L}^{\text{Br}})(\text{HL}^{\text{Br}})$  (3) and d)  $\text{H}_2\text{L}^{\text{I}}$  (1),  $\text{Gd}(\text{L}^{\text{I}})(\text{HL}^{\text{I}})$  (2),  $\text{Yb}(\text{L}^{\text{I}})(\text{HL}^{\text{I}})$  (3).

# TGA data

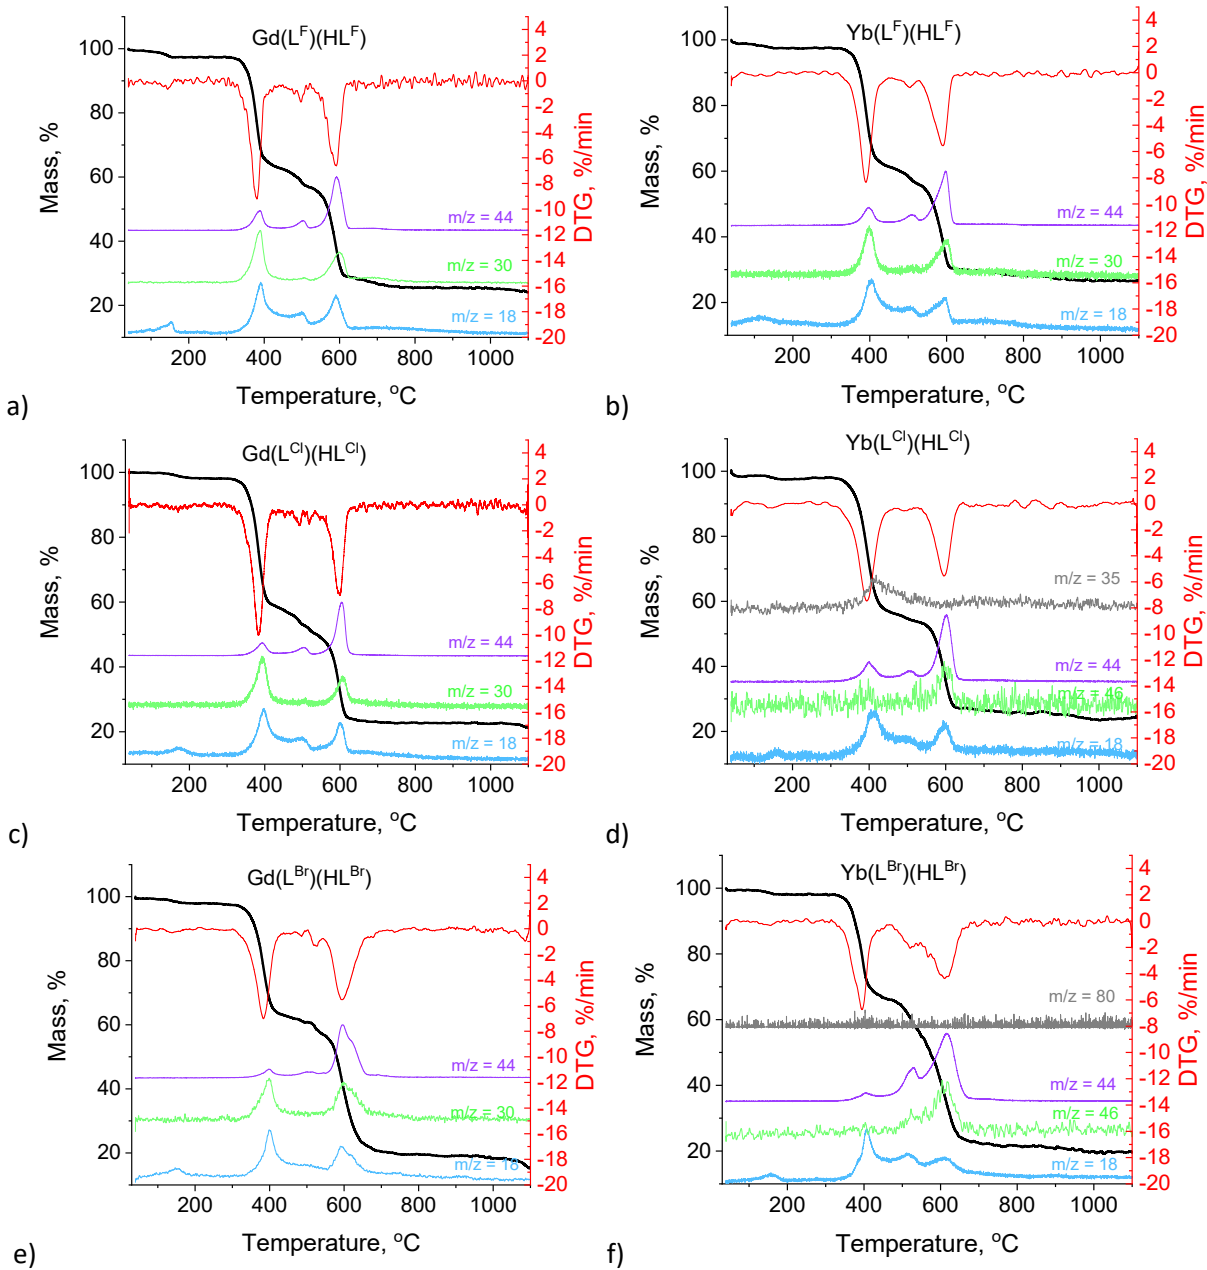

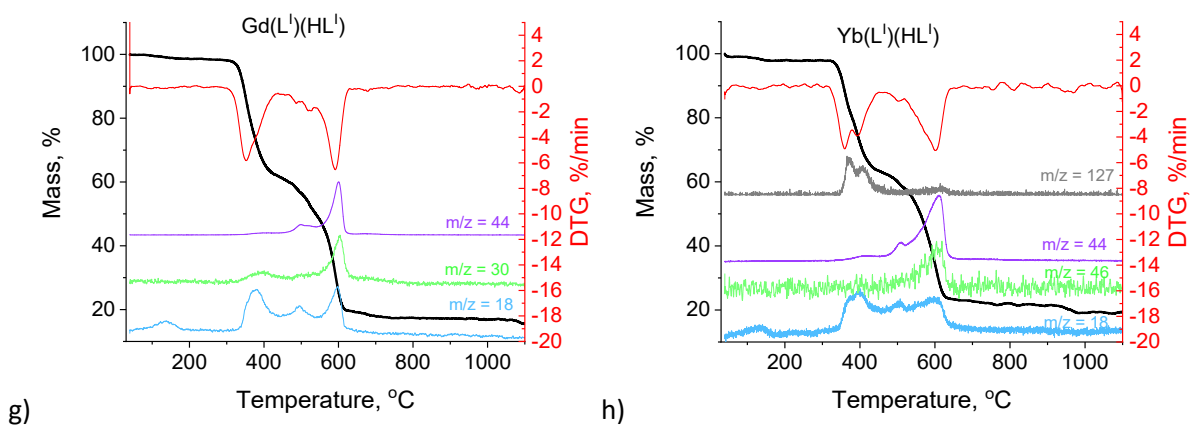

**Figure S4.** TGA and DTG data of a) Gd(L<sup>F</sup>)(HL<sup>F</sup>), b) Yb(L<sup>F</sup>)(HL<sup>F</sup>), c) Gd(L<sup>Cl</sup>)(HL<sup>Cl</sup>), d) Yb(L<sup>Cl</sup>)(HL<sup>Cl</sup>), e) Gd(L<sup>Br</sup>)(HL<sup>Br</sup>), f) Yb(L<sup>Br</sup>)(HL<sup>Br</sup>), g) Gd(L<sup>I</sup>)(HL<sup>I</sup>), h) Yb(L<sup>I</sup>)(HL<sup>I</sup>) Ionic currents are shown in blue (m/Z = 18), green (m/Z = 30) and violet (m/Z = 44).



## Photophysical properties

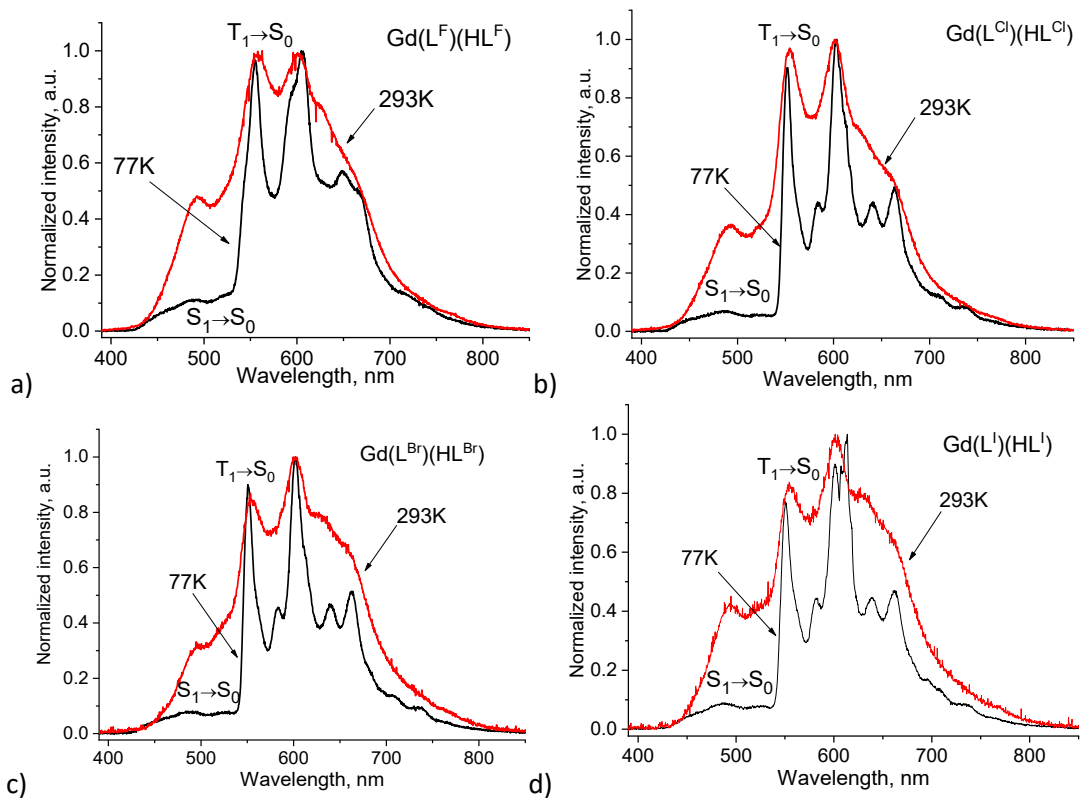

Figure S5. Luminescence spectra of gadolinium complex powders at 77 and 298 K ( $\lambda_{ex} = 337$  nm).

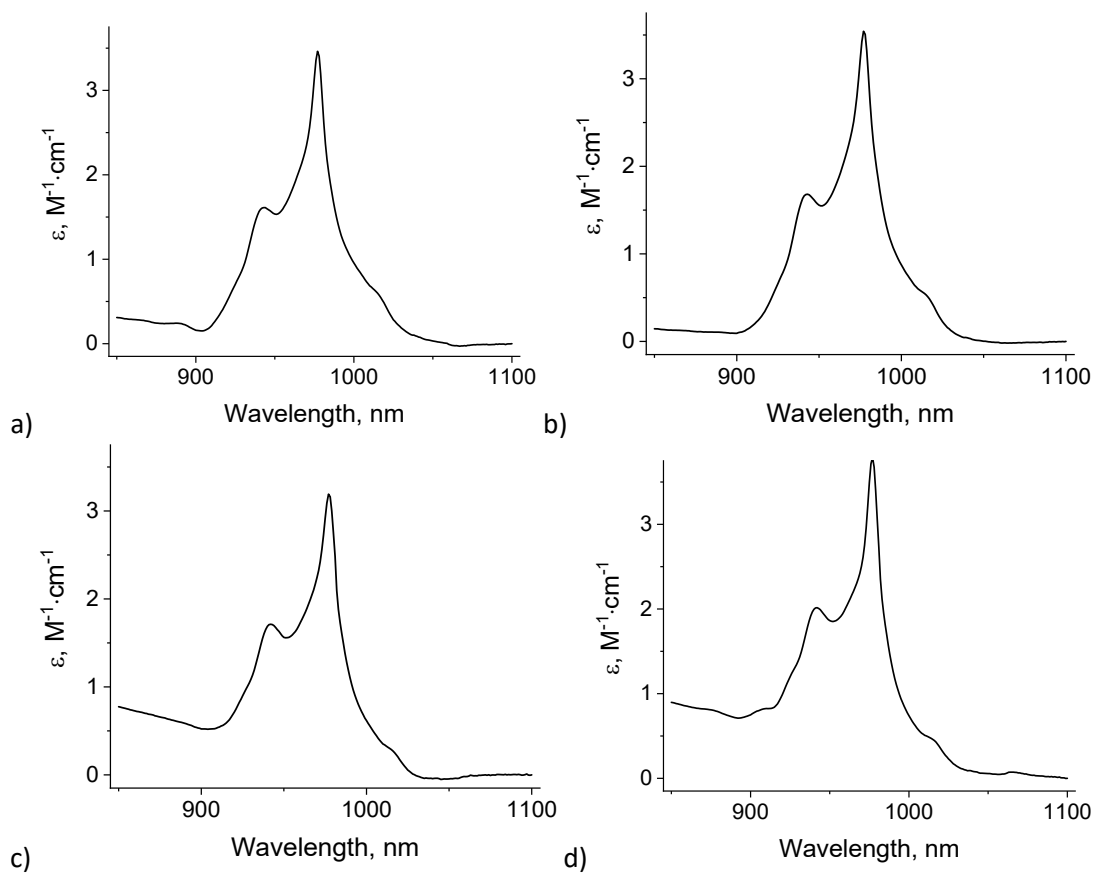

**Figure S6.** Light absorption coefficient versus wavelength of a) Yb(L<sup>F</sup>)(HL<sup>F</sup>), b) Yb(L<sup>Cl</sup>)(HL<sup>Cl</sup>), c) Yb(L<sup>Br</sup>)(HL<sup>Br</sup>) and d) Yb(L<sup>I</sup>)(HL<sup>I</sup>). Absorption spectra of the ligands and Yb(L)(HL) were obtained in DMSO solution ( $c = 2.5 \cdot 10^{-2}$  M,  $l = 10.0$  mm) in the range 800 – 1100 nm.

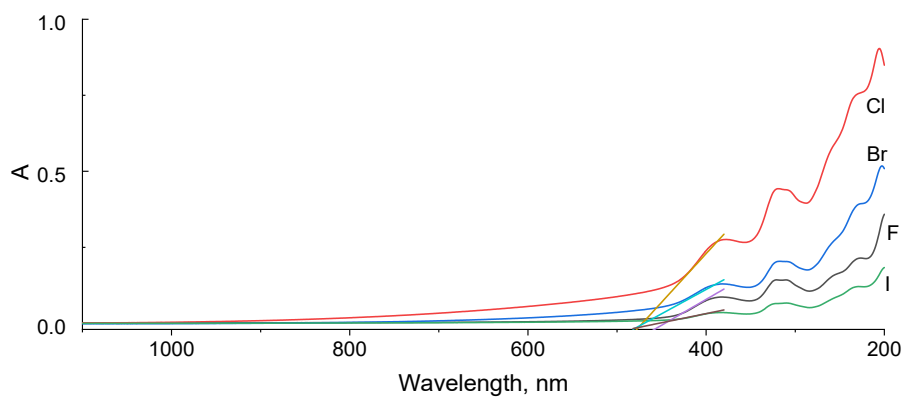

**Figure S7.** Absorption spectra of films of Yb(L<sup>F</sup>)(HL<sup>F</sup>), Yb(L<sup>Cl</sup>)(HL<sup>Cl</sup>), Yb(L<sup>Br</sup>)(HL<sup>Br</sup>) and Yb(L<sup>I</sup>)(HL<sup>I</sup>).

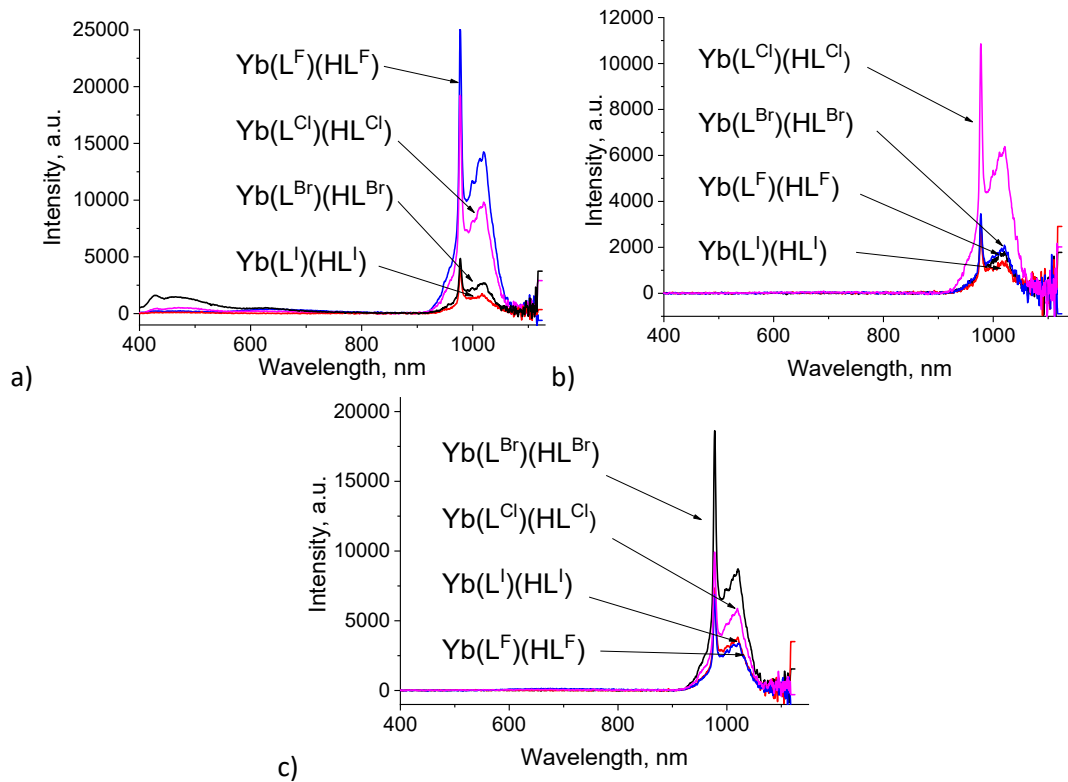

**Figure S8.** Electroluminescence spectra of OLEDs in different experiment: a) 1<sup>st</sup>, b) 2<sup>nd</sup>, and c) 3<sup>rd</sup>.

# NMR data

AGY168.esp

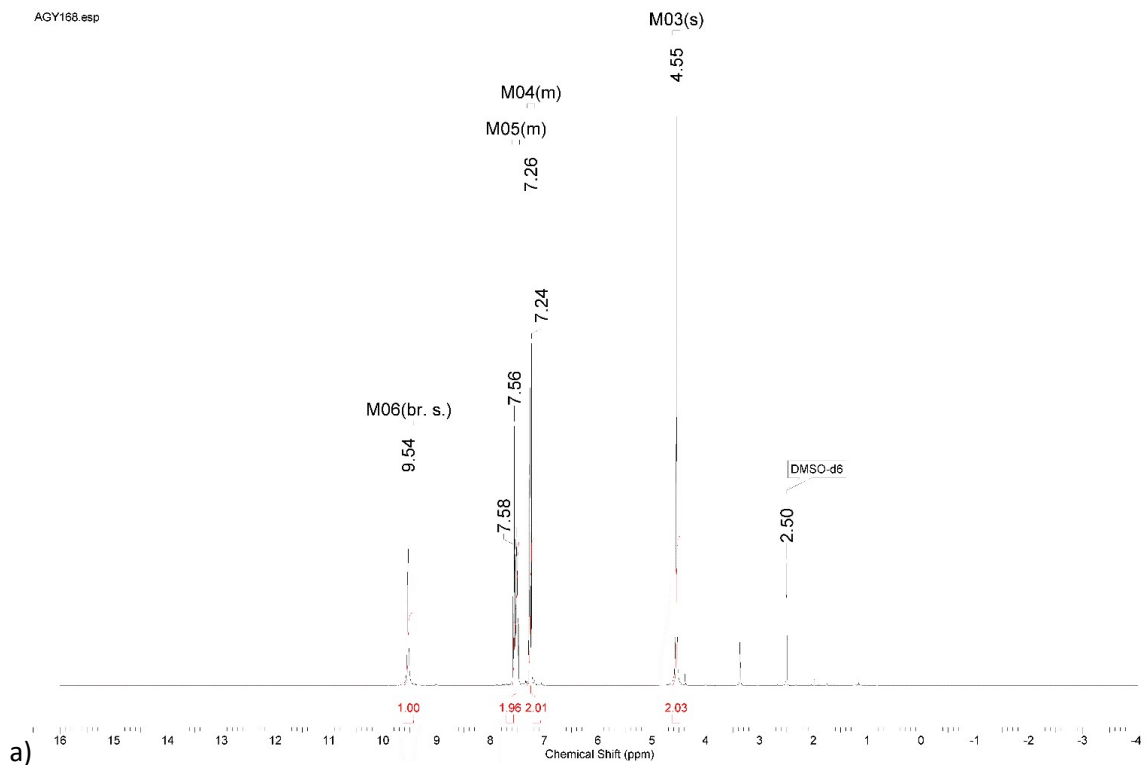

AGY120.esp

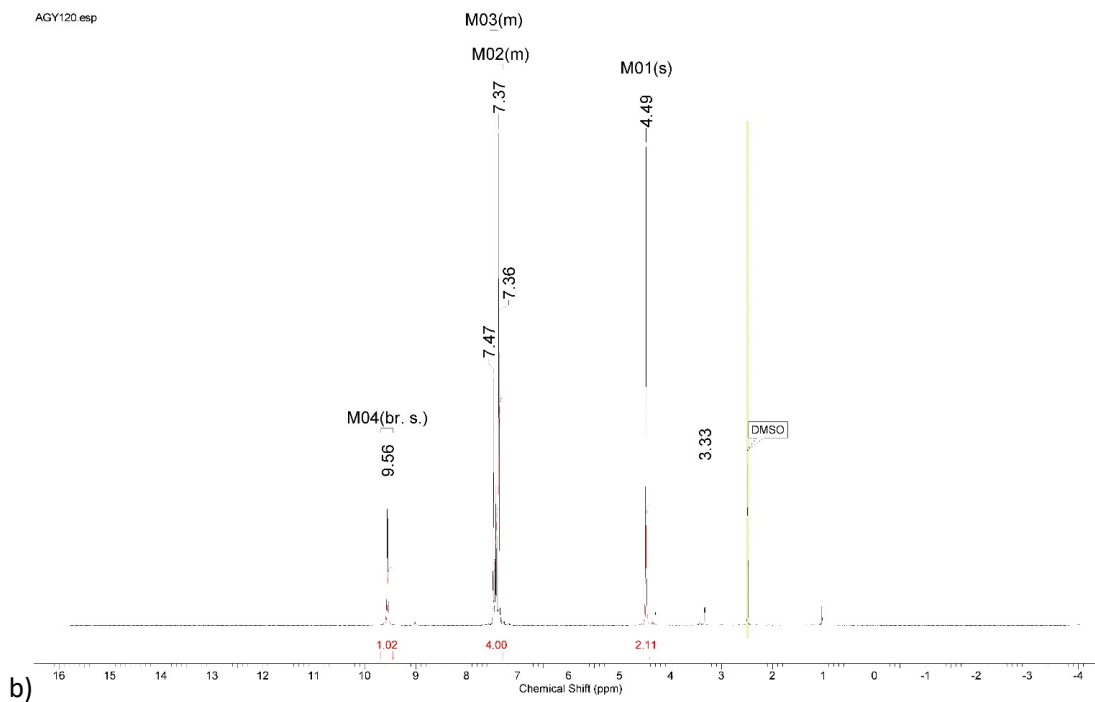

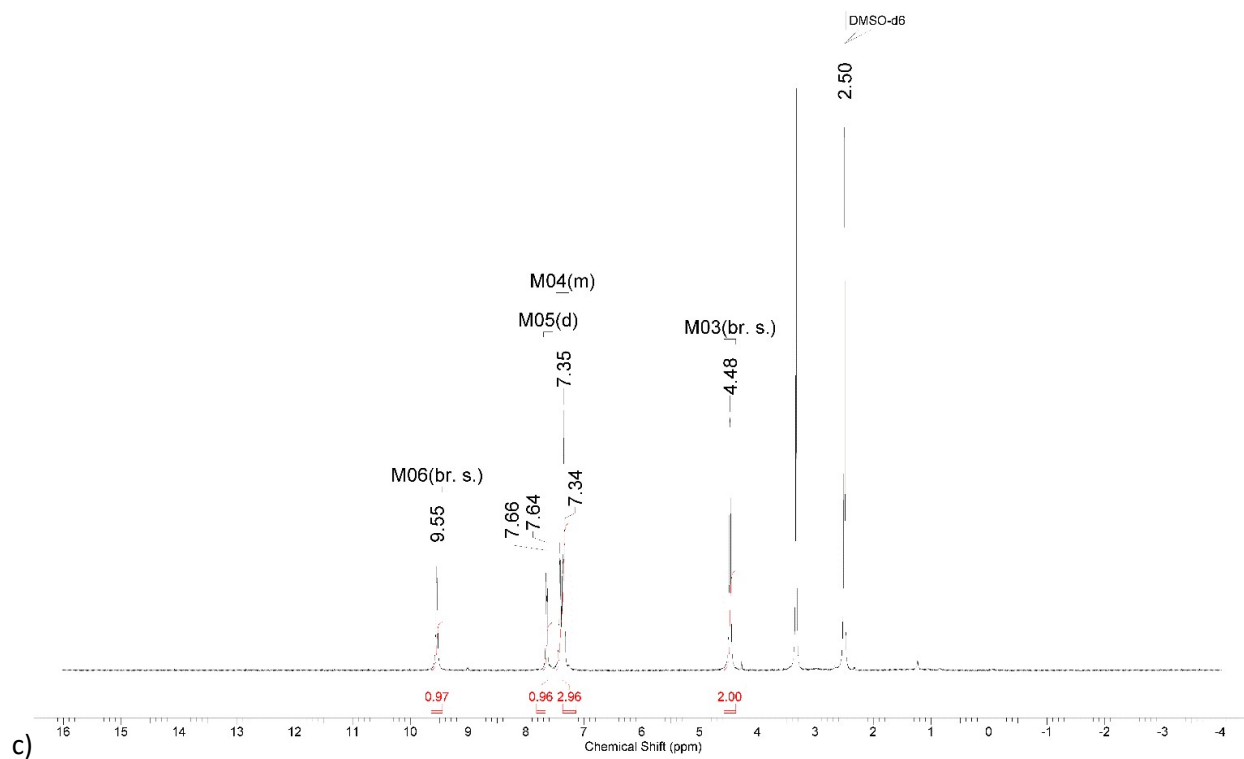

AGY130.esp

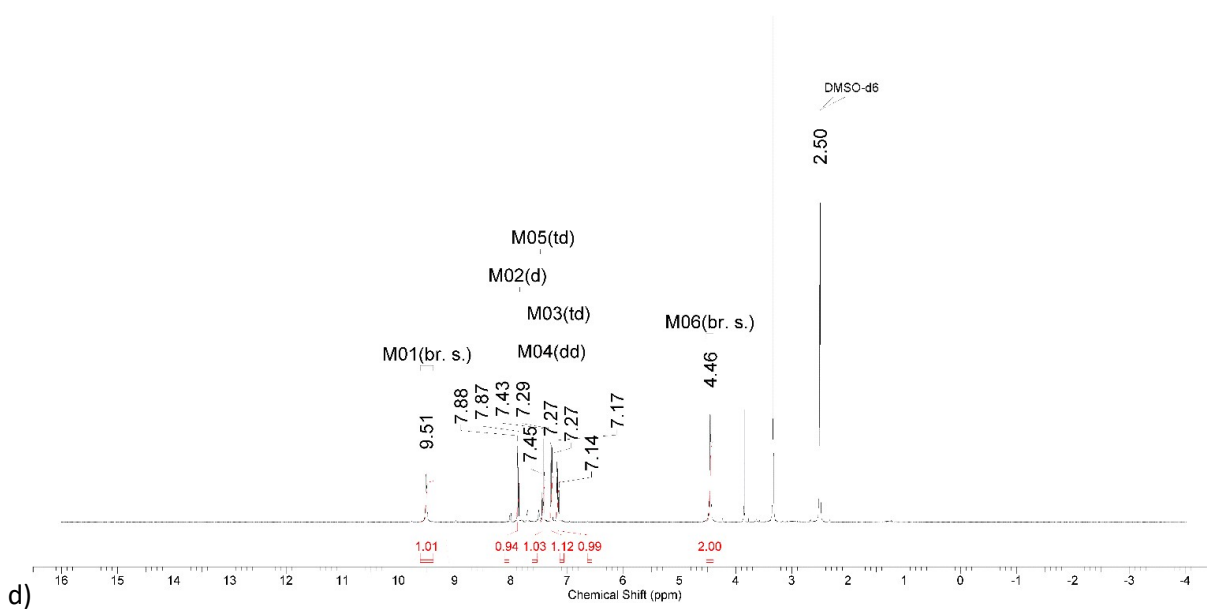

**Figure S9.** NMR spectra of a) 2-Fluorobenzohydrazide, b) 2-Chlorobenzohydrazide, c) 2-Bromobenzohydrazide, d) 2-Iodobenzohydrazide.

$^1\text{H}$ ,  $^{13}\text{C}$  NMR spectra were recorded at 25 °C using Bruker Avance 400 spectrometer with the operating frequency of 400 and 101 MHz, respectively. Chemical shifts are reported in ppm relative to residual solvent signals.

a) 2-Fluorobenzohydrazide. Yield 79%. White powder.  $^1\text{H}$  NMR (400 MHz,  $\text{DMSO-}d_6$ )  $\delta$  ppm 4.54 (s, 2 H) 7.17 - 7.31 (m, 2 H) 7.45 - 7.59 (m, 2 H) 9.53 (br. s., 1 H).

b) 2-Chlorobenzohydrazide. Yield 43%. White powder.  $^1\text{H}$  NMR (400 MHz,  $\text{DMSO-}d_6$ )  $\delta$  ppm 4.49 (s, 2 H) 7.29 - 7.40 (m, 2 H) 7.40 - 7.55 (m, 2 H) 9.56 (br. s., 1 H).

c) 2-Bromobenzohydrazide. Yield 53%. White powder.  $^1\text{H}$  NMR (400 MHz,  $\text{DMSO-}d_6$ )  $\delta$  ppm 4.48 (br. s., 2 H) 7.26 - 7.48 (m, 3 H) 7.65 (d,  $J=7.58$  Hz, 1 H) 9.55 (br. s., 1 H).

d) 2-Iodobenzohydrazide. Yield 62%. White powder.  $^1\text{H}$  NMR (400 MHz,  $\text{DMSO-}d_6$ )  $\delta$  ppm 4.46 (br. s., 2 H) 7.16 (td,  $J=7.64$ , 1.59 Hz, 1 H) 7.28 (dd,  $J=7.52$ , 1.53 Hz, 1 H) 7.43 (td,  $J=7.46$ , 0.98 Hz, 1 H) 7.88 (d,  $J=7.82$  Hz, 1 H) 9.51 (br. s., 1 H)

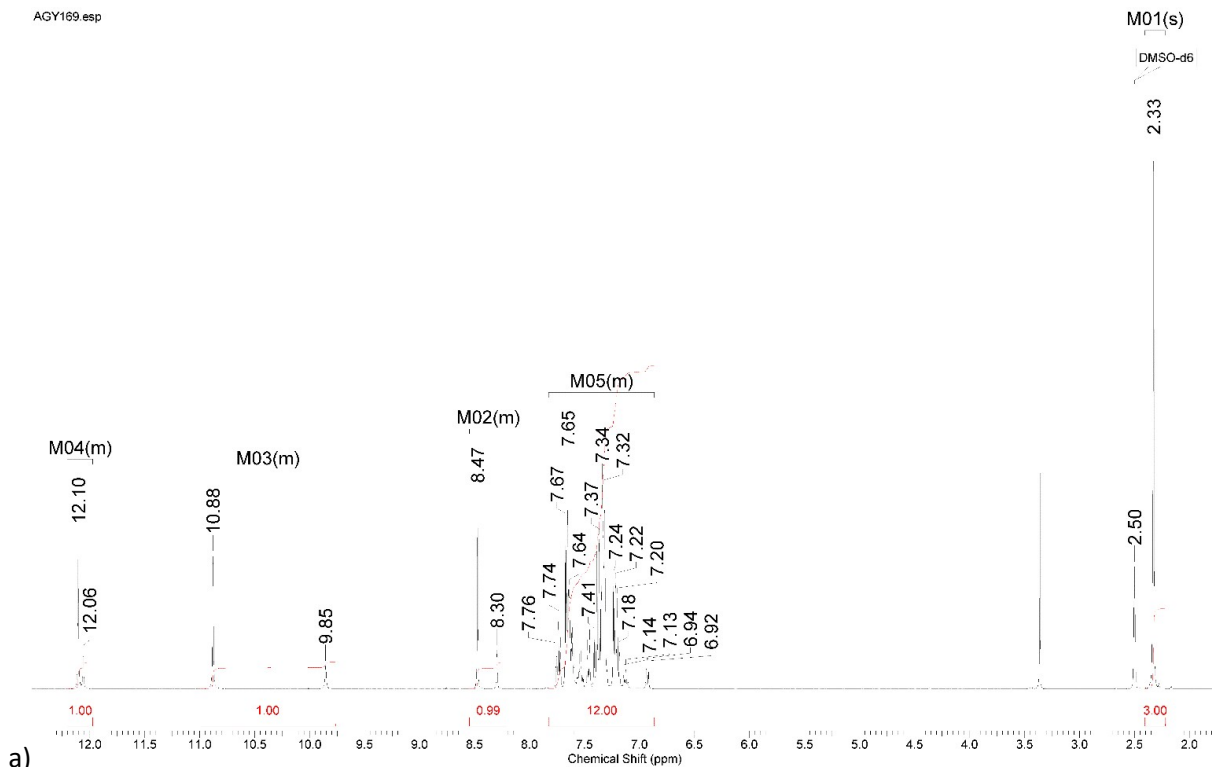

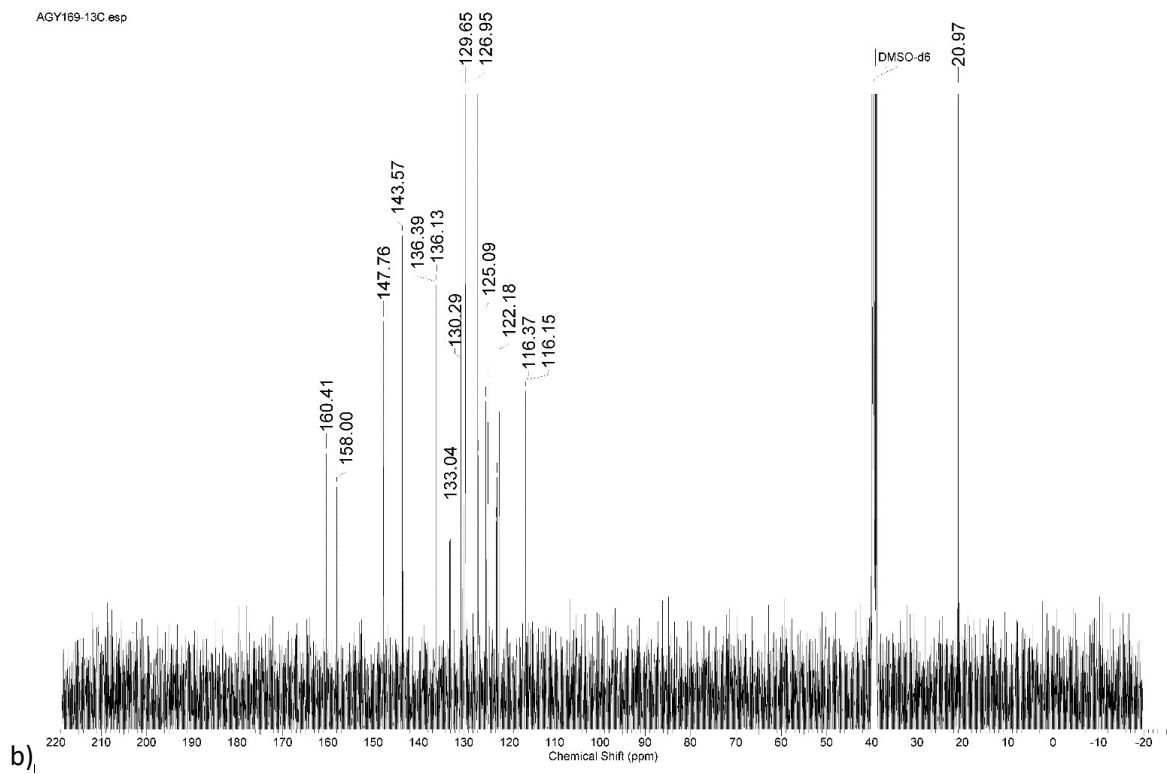

b)

AGY131.esp

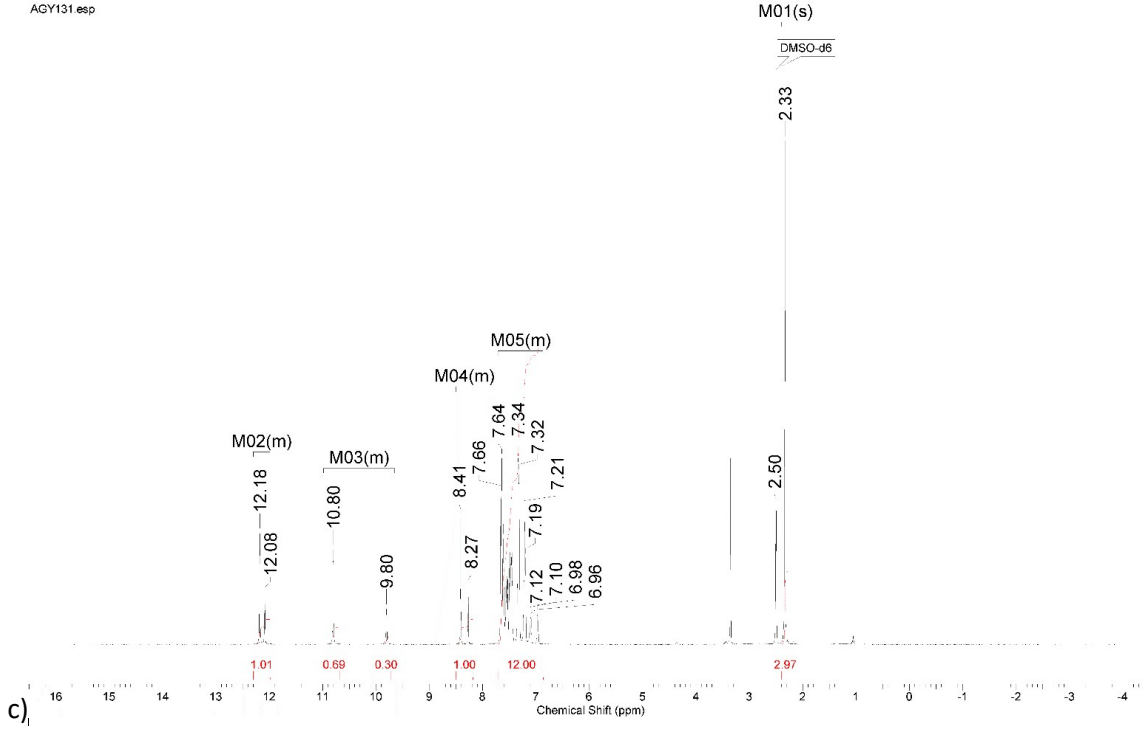

c)

AGY131-13C.esp

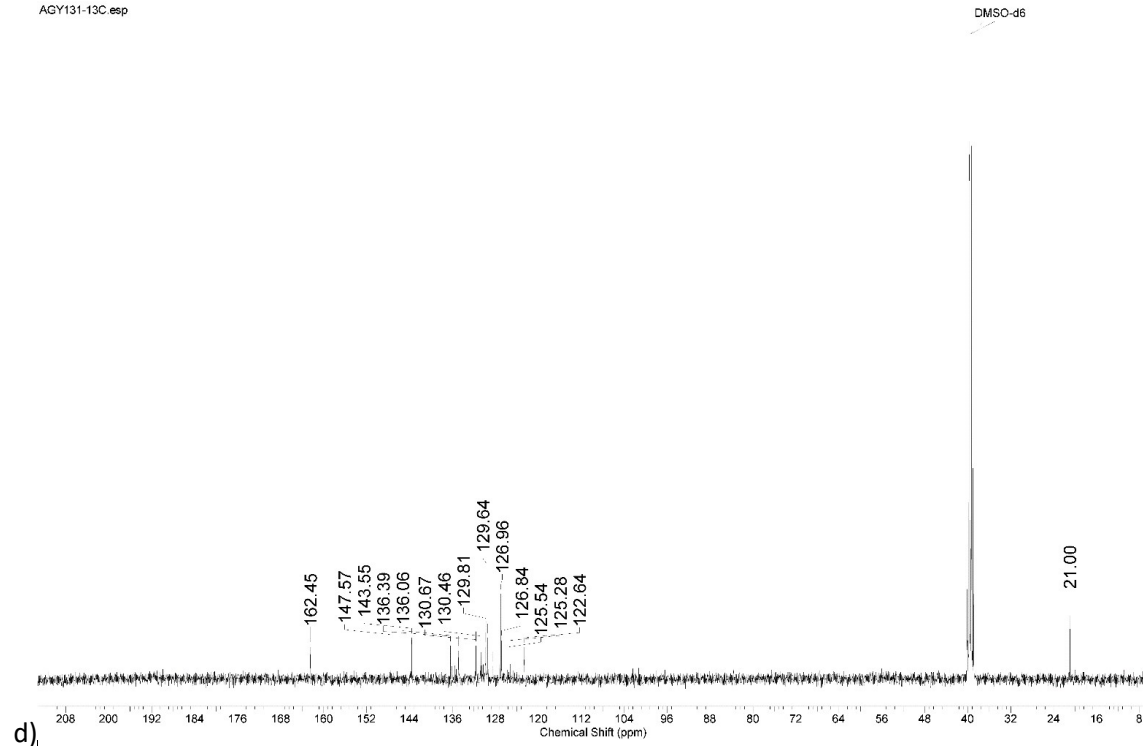

d)



AGY114.esp

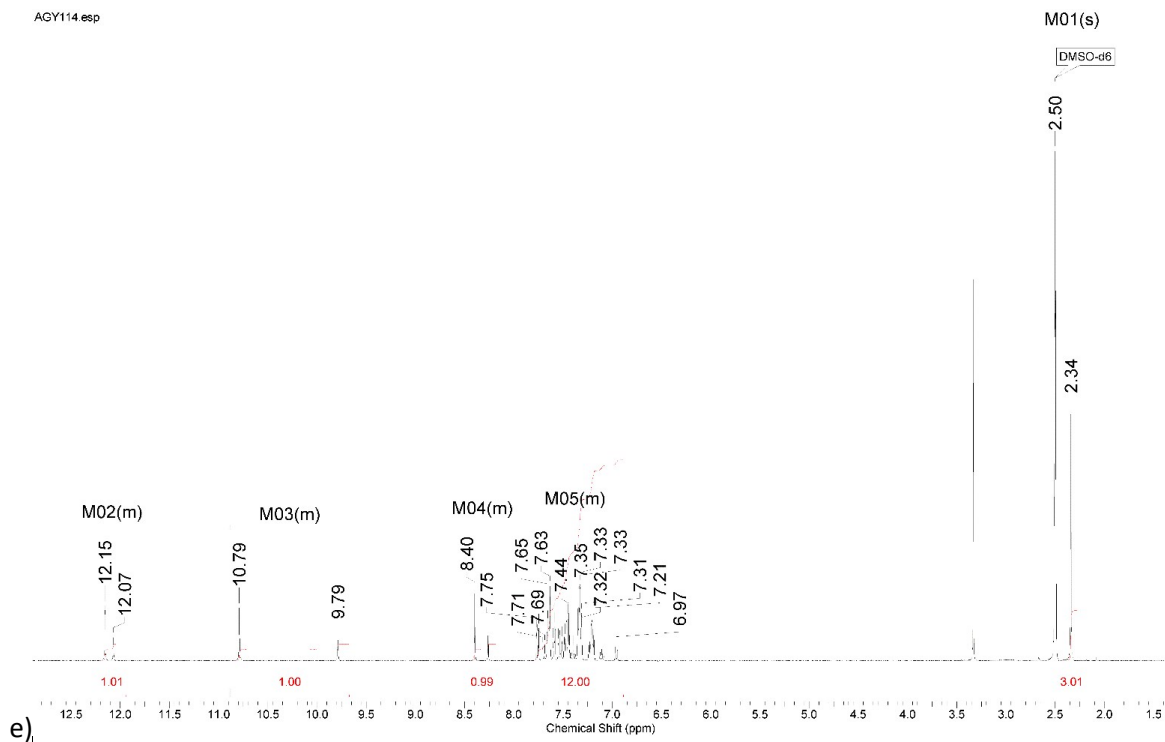

e)

AGY91-13C.esp

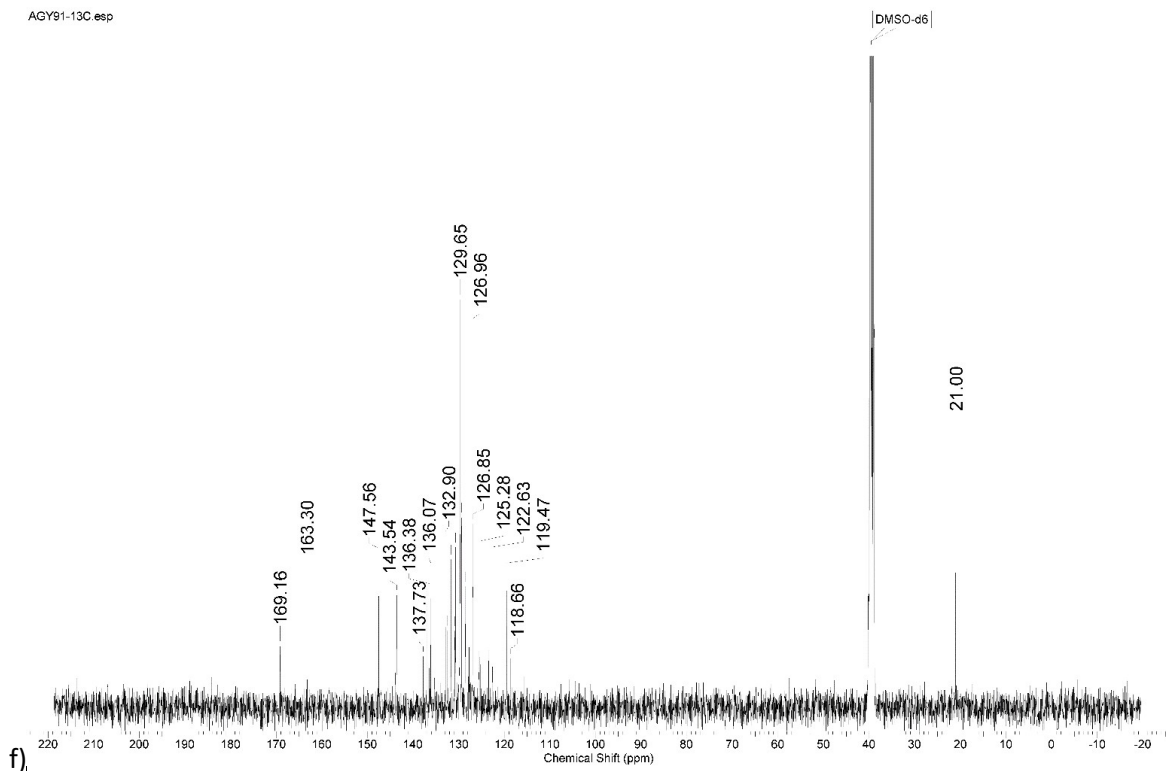

f)

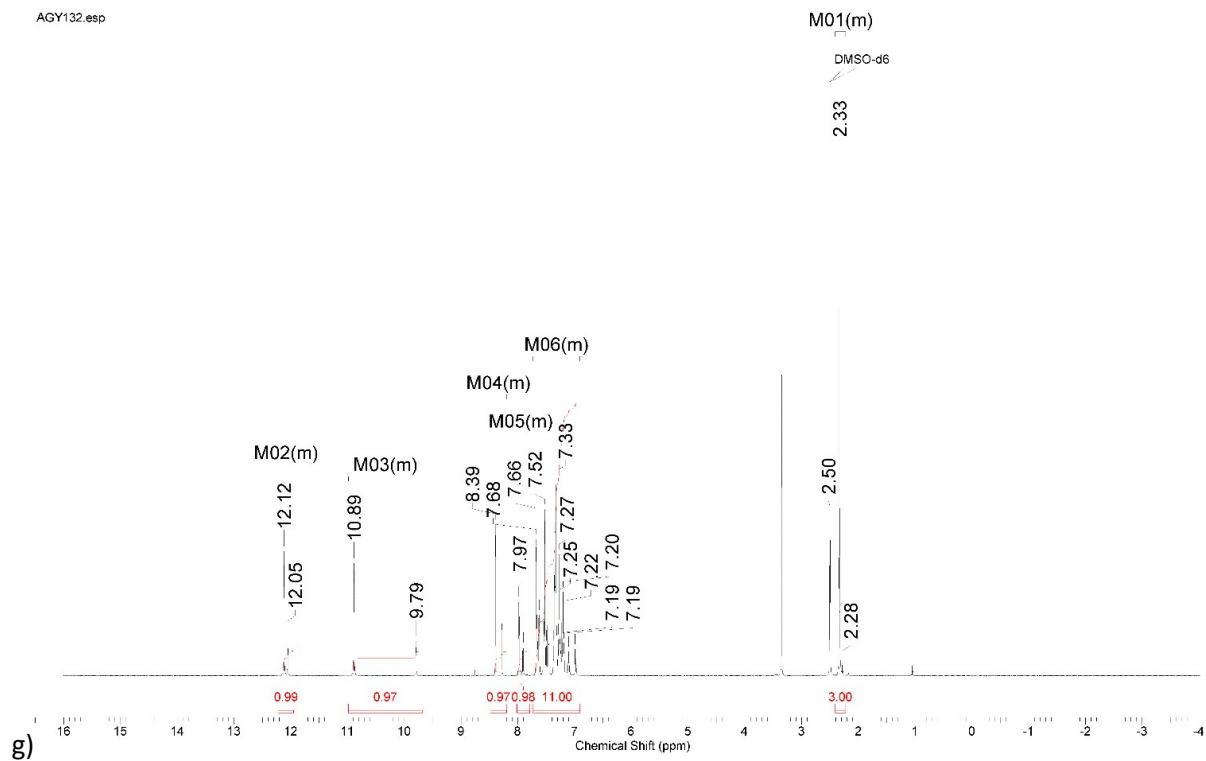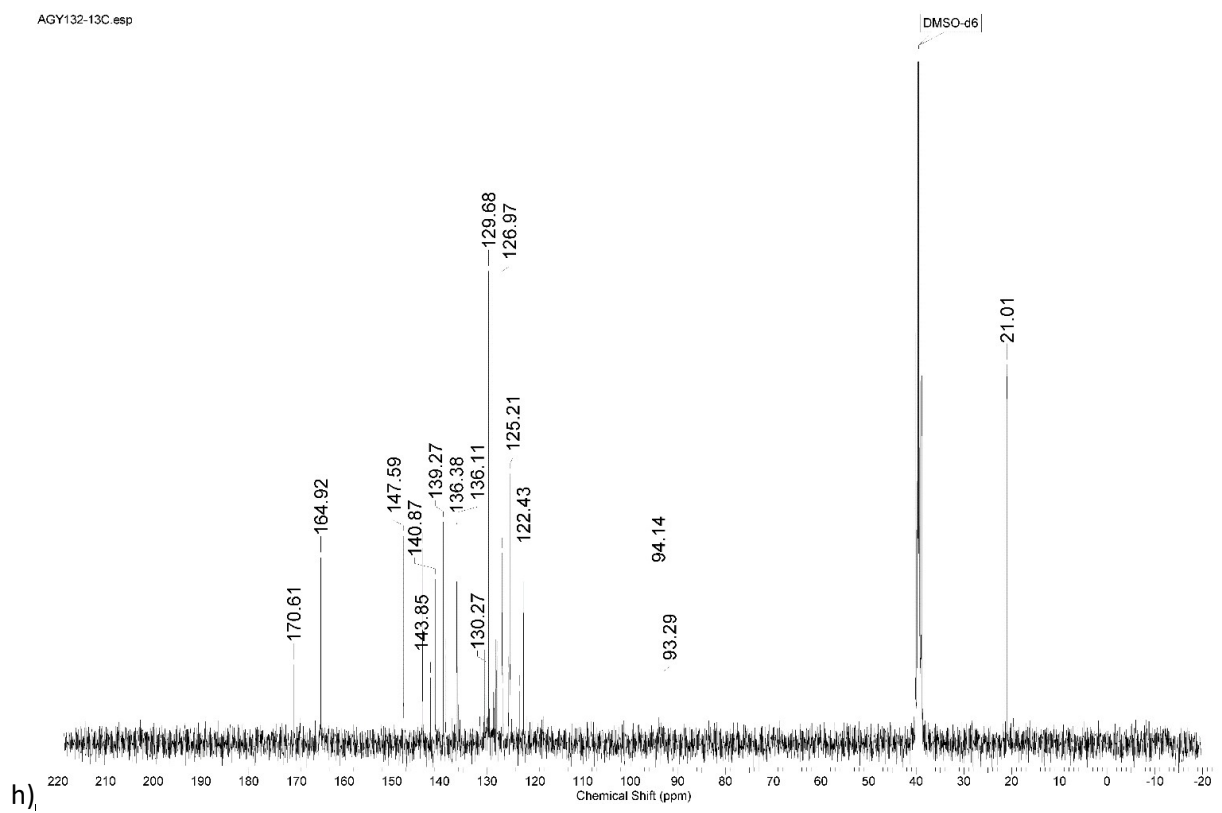

**Figure S10.** NMR spectra of a)  $\text{H}_2\text{L}^{\text{F}}$ , b)  $\text{H}_2\text{L}^{\text{F}}$  (13C), c)  $\text{H}_2\text{L}^{\text{Cl}}$ , d)  $\text{H}_2\text{L}^{\text{Cl}}$  (13C), e)  $\text{H}_2\text{L}^{\text{Br}}$ , f)  $\text{H}_2\text{L}^{\text{Br}}$  (13C), g)  $\text{H}_2\text{L}^{\text{I}}$ , h)  $\text{H}_2\text{L}^{\text{I}}$  (13C).

a-b) H<sub>2</sub>L<sup>F</sup>: Yield 94%. Colorless crystals. X-Ray quality crystal was obtained by slow evaporation of ethanolic solution. <sup>1</sup>H NMR (400 MHz, DMSO-*d*<sub>6</sub>) δ ppm 2.33 (s, 3 H) 6.87 - 7.83 (m, 12 H) 8.21 - 8.55 (m, 1 H) 9.77 - 11.00 (m, 1 H) 11.97 - 12.20 (m, 1 H). <sup>13</sup>C NMR (101 MHz, DMSO-*d*<sub>6</sub>) δ ppm 20.97, 116.15, 116.37, 122.18, 122.71, 122.86, 124.70, 125.09, 125.22, 125.96, 126.83, 126.95, 129.65, 130.08, 130.29, 130.65, 133.04, 133.12, 136.13, 136.39, 143.57, 147.76, 158.00, 160.41, 160.48.

c-d) H<sub>2</sub>L<sup>Cl</sup>: Yield 74%. Colorless crystals. <sup>1</sup>H NMR (400 MHz, DMSO-*d*<sub>6</sub>) δ ppm 2.33 (s, 3 H) 6.87 - 7.71 (m, 12 H) 8.18 - 8.50 (m, 1 H) 9.65 - 10.98 (m, 1 H) 11.99 - 12.30 (m, 1 H). <sup>13</sup>C NMR (101 MHz, DMSO-*d*<sub>6</sub>) δ ppm 21.00, 122.64, 123.66, 125.28, 125.54, 125.70, 126.84, 126.96, 127.20, 127.33, 128.42, 128.53, 129.34, 129.41, 129.64, 129.81, 129.89, 130.29, 130.46, 130.67, 131.59, 134.87, 135.31, 135.57, 136.06, 136.16, 136.39, 143.55, 147.57, 162.45.

e-f) H<sub>2</sub>L<sup>Br</sup>: Yield 90%. Colorless crystals. <sup>1</sup>H NMR (400 MHz, DMSO-*d*<sub>6</sub>) δ ppm 2.34 (s, 3 H) 6.89 - 7.87 (m, 12 H) 8.19 - 8.46 (m, 1 H) 9.67 - 10.88 (m, 1 H) 11.94 - 12.23 (m, 1 H). <sup>13</sup>C NMR (101 MHz, DMSO-*d*<sub>6</sub>) δ ppm 21.00, 118.66, 119.47, 122.63, 123.46, 125.28, 125.52, 125.64, 126.85, 126.96, 127.65, 127.78, 128.53, 129.37, 129.65, 129.91, 130.29, 130.67, 130.85, 131.68, 132.43, 132.90, 135.32, 136.07, 136.16, 136.38, 137.01, 137.73, 143.54, 143.92, 147.56, 163.30, 169.16.

g-h) H<sub>2</sub>L<sup>I</sup>: Yield 76%. Colorless crystals. <sup>1</sup>H NMR (400 MHz, DMSO-*d*<sub>6</sub>) δ ppm 2.23 - 2.41 (m, 3 H) 6.91 - 7.73 (m, 11 H) 7.83 - 8.06 (m, 1 H) 8.20 - 8.49 (m, 1 H) 9.68 - 10.98 (m, 1 H) 11.95 - 12.22 (m, 1 H). <sup>13</sup>C NMR (101 MHz, DMSO-*d*<sub>6</sub>) δ ppm 21.01, 93.29, 94.14, 122.43, 123.27, 125.21, 125.57, 126.77, 126.90, 126.97, 127.95, 128.04, 128.16, 128.64, 128.71, 129.63, 129.68, 130.12, 130.27, 130.65, 131.52, 135.33, 136.11, 136.17, 136.38, 138.69, 139.27, 140.87, 141.85, 143.50, 143.54, 143.85, 147.59, 164.92, 170.61.

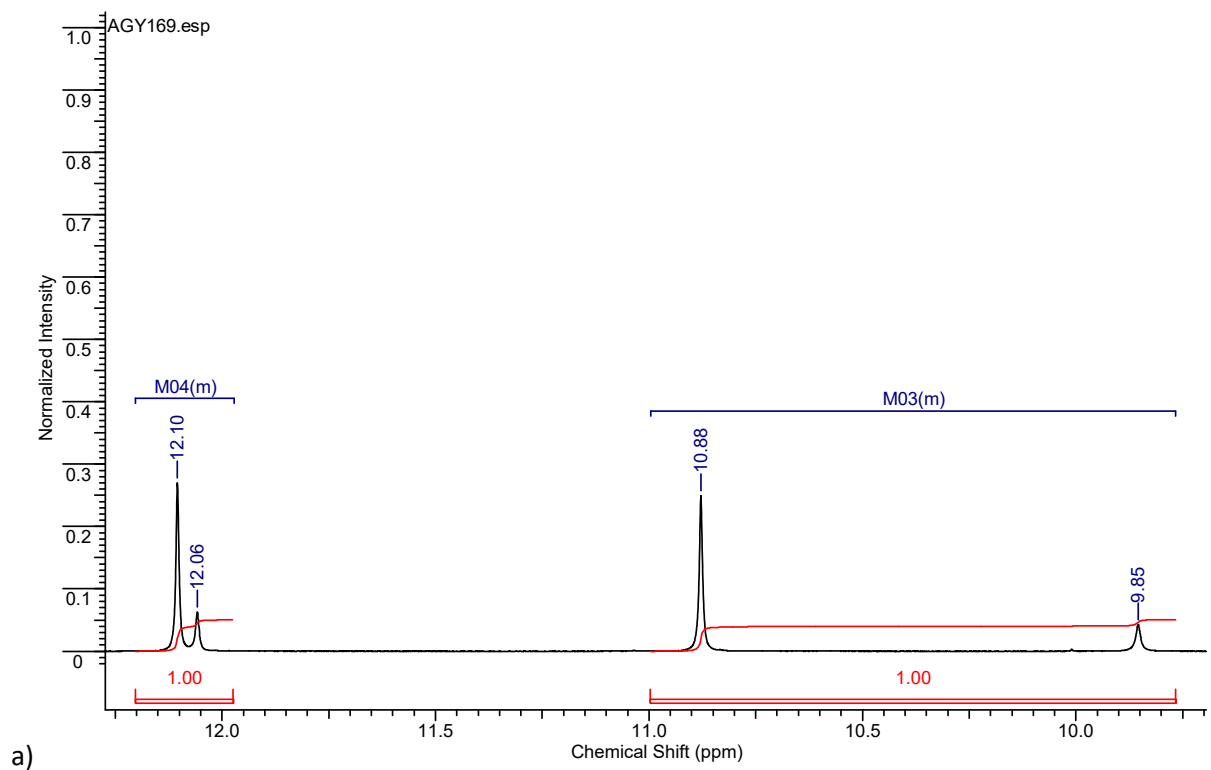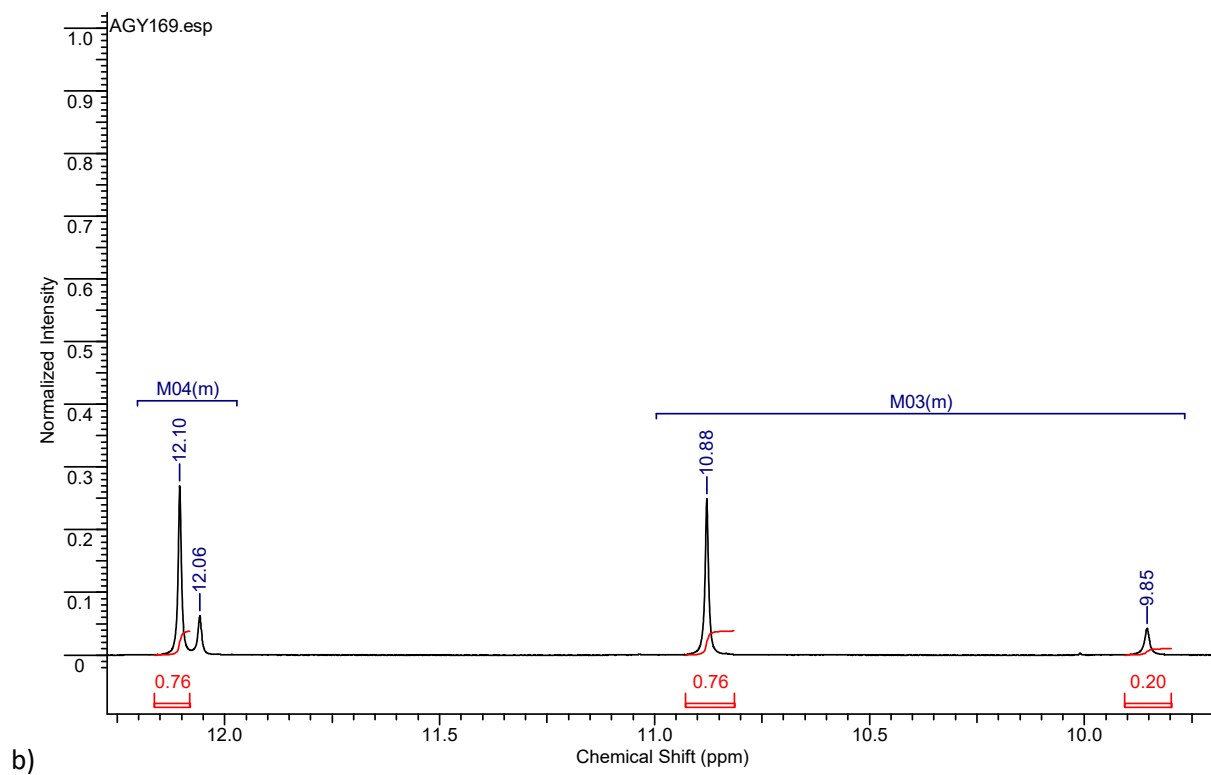

Figure S11. Zoomed part of the  $^1\text{H}$  NMR spectrum of  $\text{H}_2\text{L}^{\text{F}}$ .

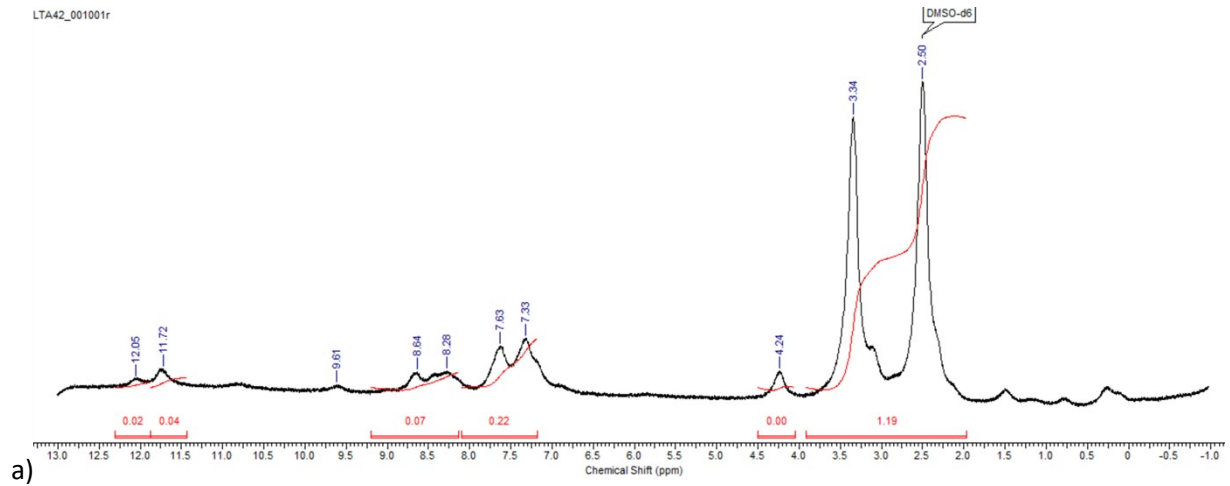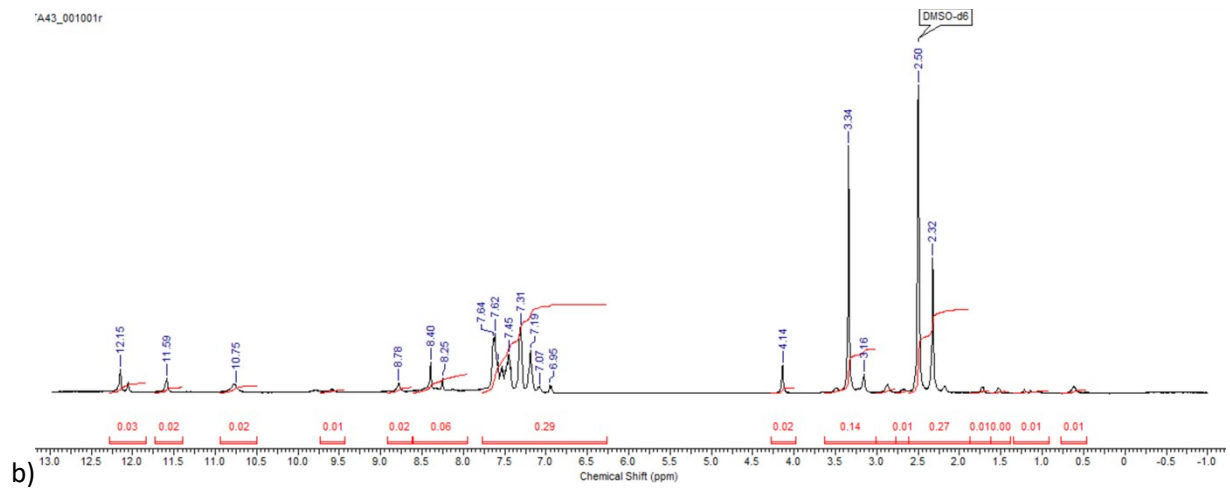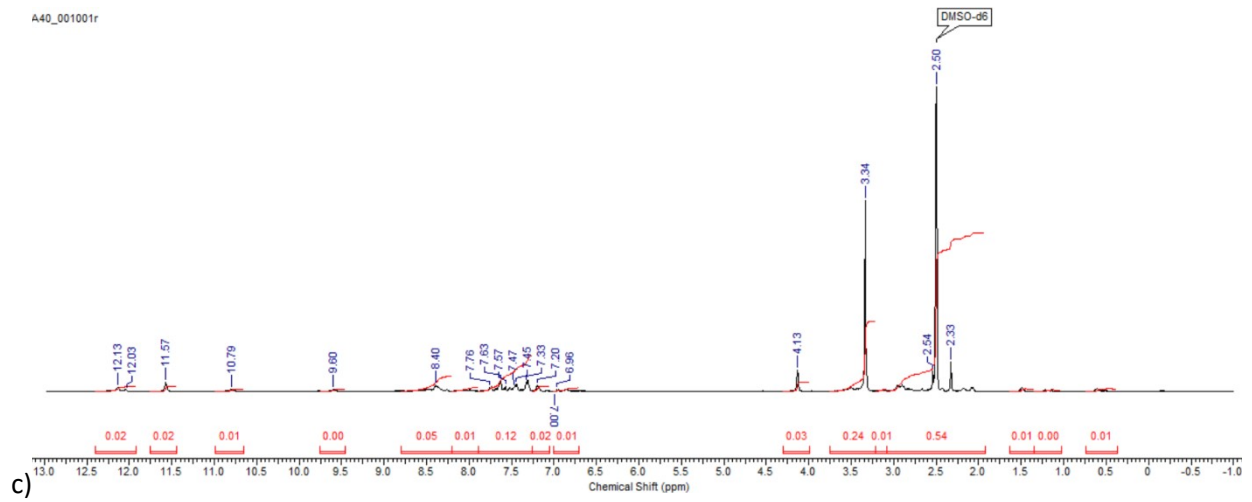

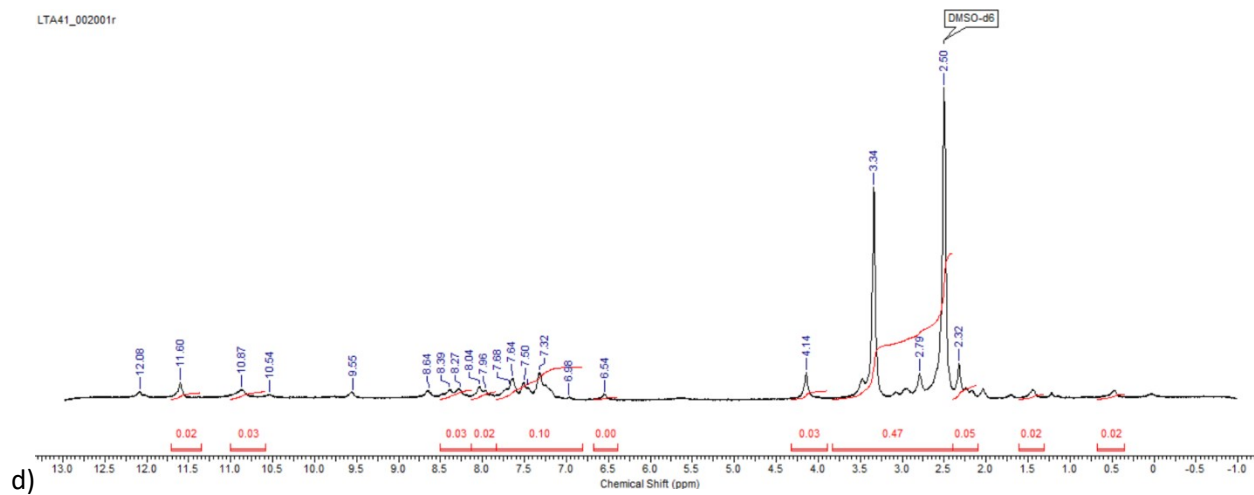

**Figure S12.**  $^1\text{H}$  NMR spectra of a)  $\text{Yb}(\text{L}^{\text{F}})(\text{HL}^{\text{F}})$ , b)  $\text{Yb}(\text{L}^{\text{Cl}})(\text{HL}^{\text{Cl}})$ , c)  $\text{Yb}(\text{L}^{\text{Br}})(\text{HL}^{\text{Br}})$ , d)  $\text{Yb}(\text{HL}^{\text{I}})(\text{HL}^{\text{I}})$ .

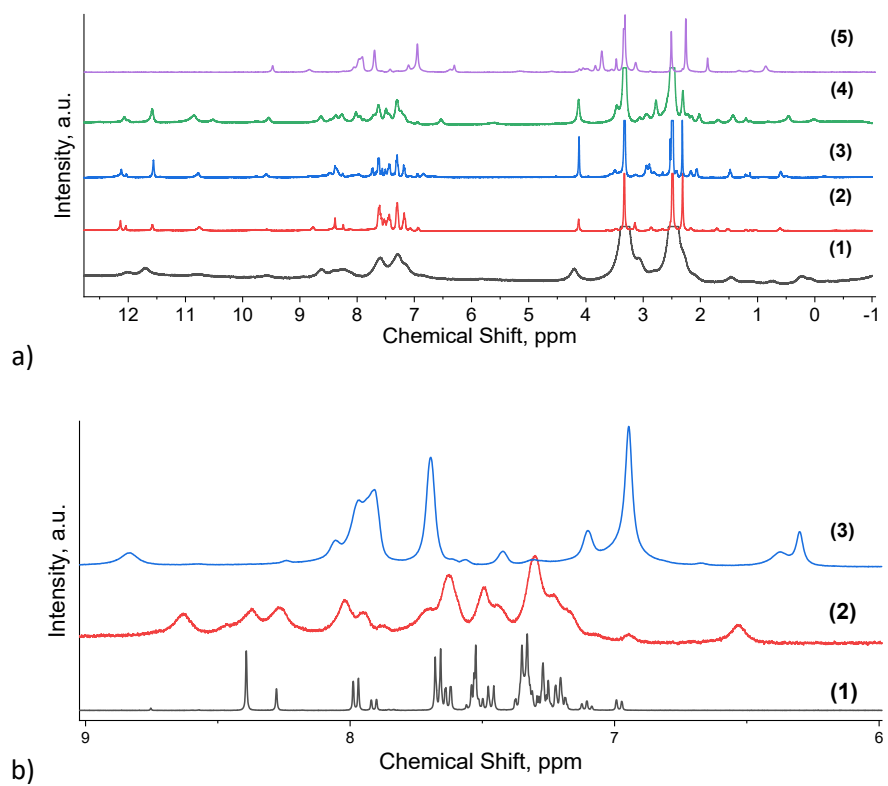

**Figure S13.** a)  $^1\text{H}$  NMR spectra of spectra of a)  $\text{Yb}(\text{L}^{\text{F}})(\text{HL}^{\text{F}})$  (1),  $\text{Yb}(\text{L}^{\text{Cl}})(\text{HL}^{\text{Cl}})$  (2),  $\text{Yb}(\text{L}^{\text{Br}})(\text{HL}^{\text{Br}})$  (3),  $\text{Yb}(\text{L}^{\text{I}})(\text{HL}^{\text{I}})$  (4) and the reference complex  $\text{K}[\text{Yb}(\text{L})_2]$  from  $^{17}$  (5) and b) zoomed part of the  $^1\text{H}$  NMR spectra of  $\text{HL}^{\text{I}}$  (1),  $\text{Yb}(\text{L}^{\text{I}})(\text{HL}^{\text{I}})$  (2),  $\text{KYb}(\text{L}^{\text{H}})_2$  (3).

# Mass-spectroscopy data

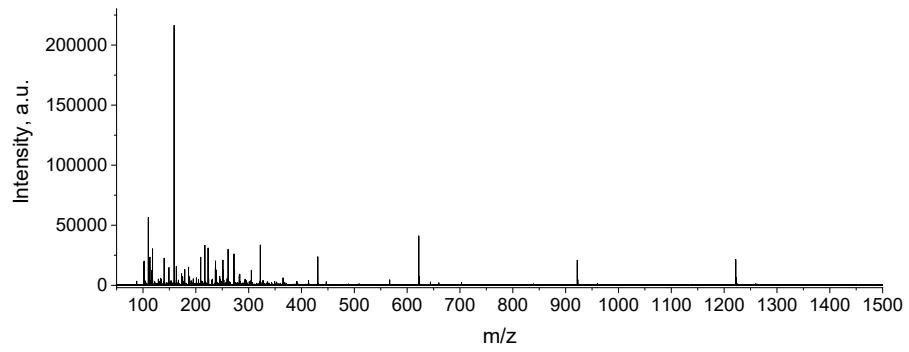

a)

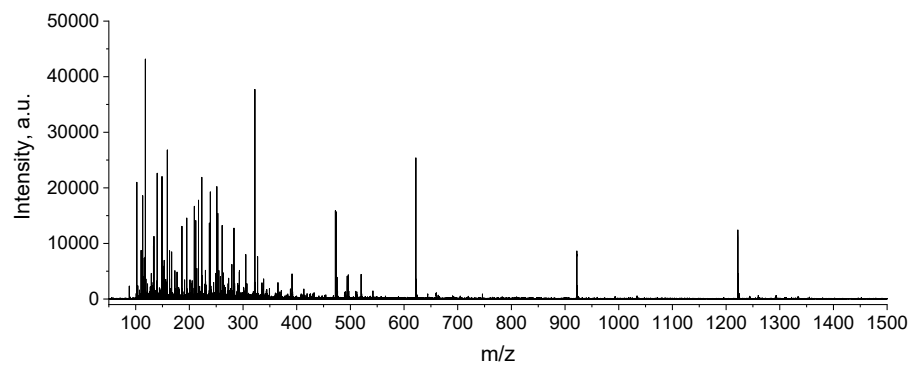

b)

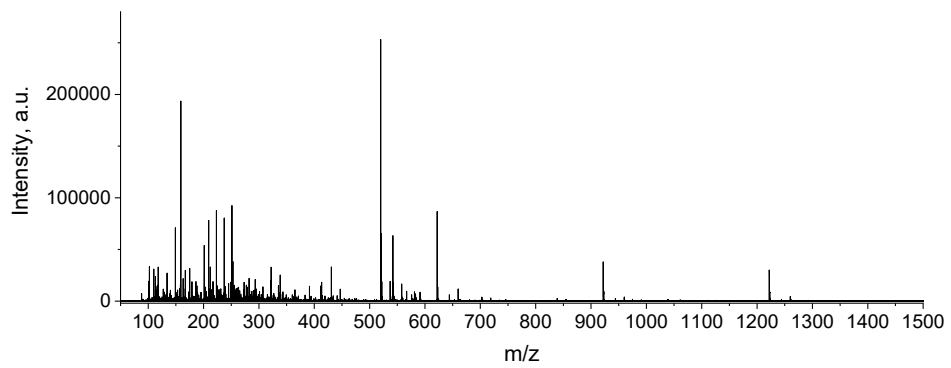

c)



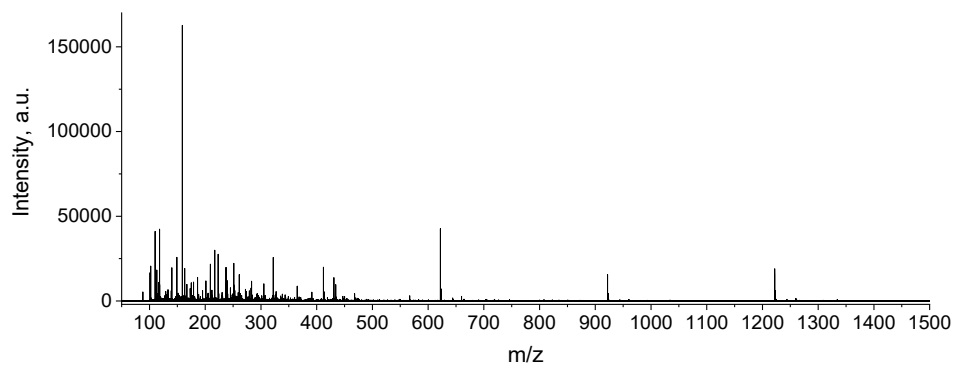

d)

**Figure S14.** ES MS spectra of a) Yb(L<sup>F</sup>)(HL<sup>F</sup>), b) Yb(L<sup>Cl</sup>)(HL<sup>Cl</sup>), c) Yb(L<sup>Br</sup>)(HL<sup>Br</sup>), d) Yb(HL<sup>I</sup>)(HL<sup>I</sup>).

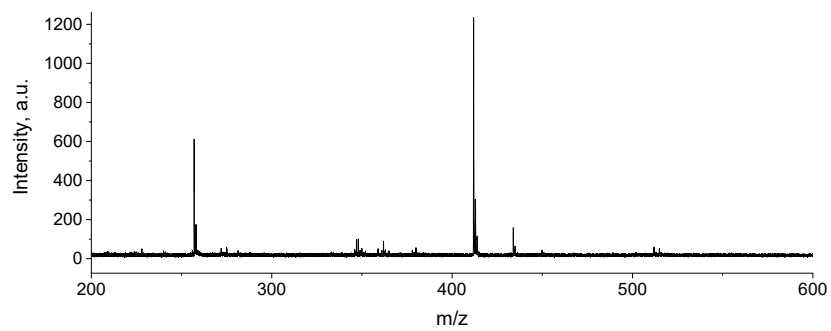

a)

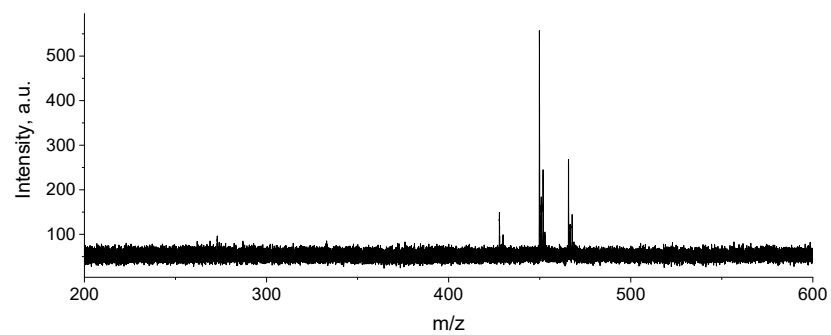

b)

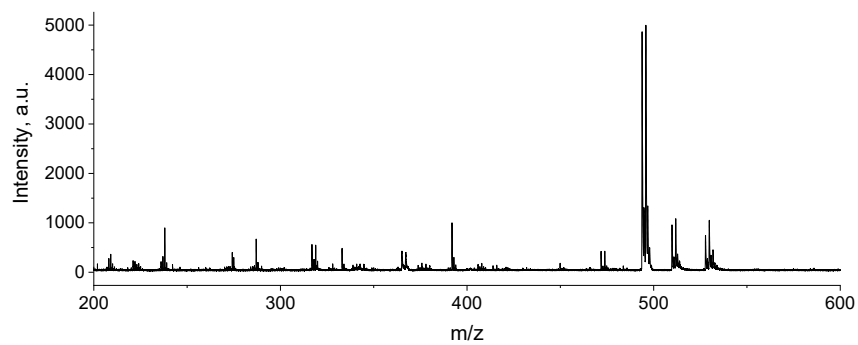

c)

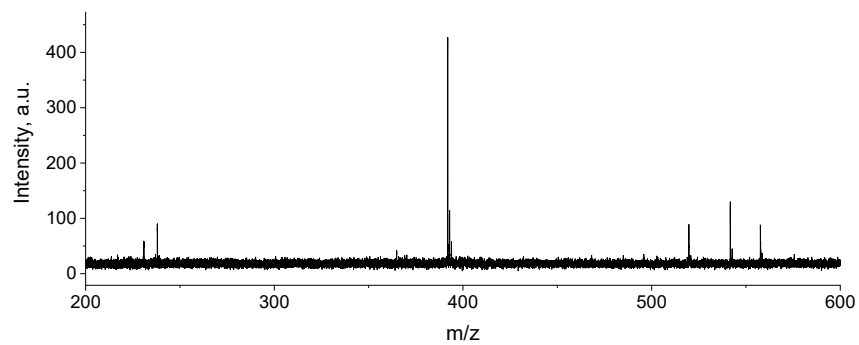

d)

Figure 15. MALDI spectra of a)  $H_2L^F$ , b)  $H_2L^{Cl}$ , c)  $H_2L^{Br}$ , d)  $H_2L^I$ .

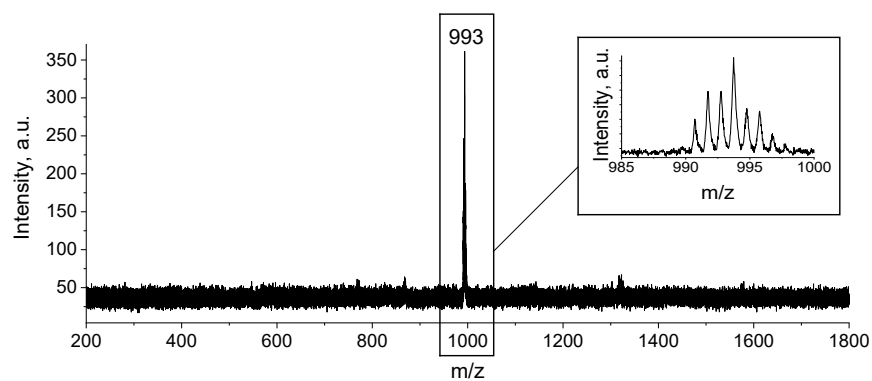

a)

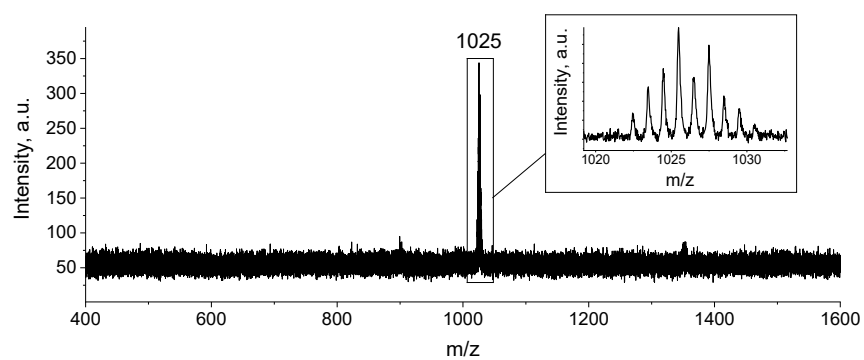

b)

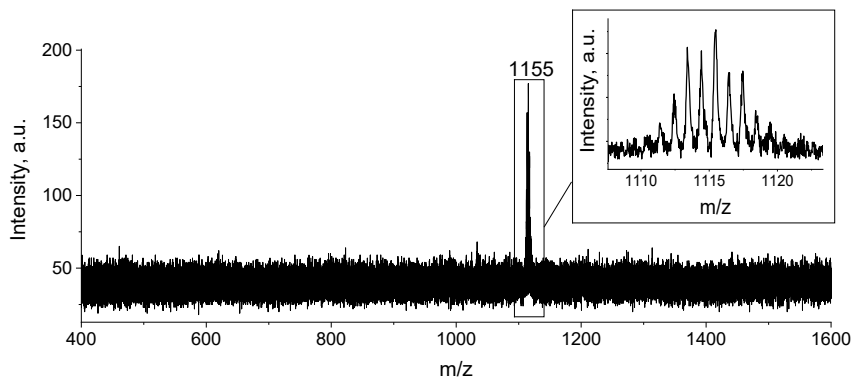

c)

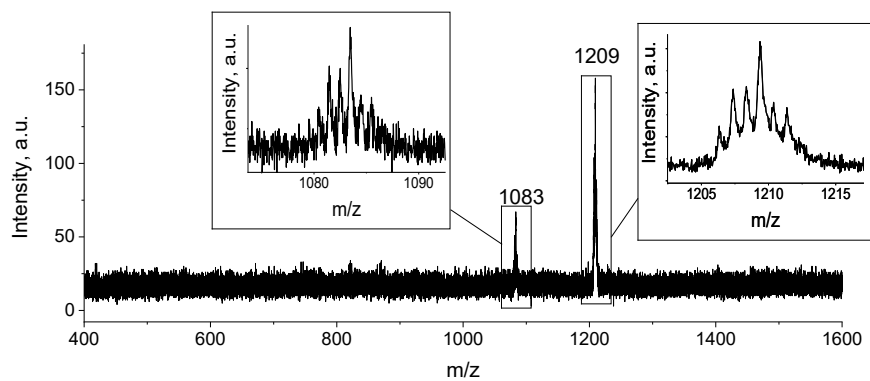

d)

**Figure 16.** MALDI spectra of a)  $\text{Yb}(\text{L}^{\text{F}})(\text{HL}^{\text{F}})$ , b)  $\text{Yb}(\text{L}^{\text{Cl}})(\text{HL}^{\text{Cl}})$ , c)  $\text{Yb}(\text{L}^{\text{Br}})(\text{HL}^{\text{Br}})$ , d)  $\text{Yb}(\text{L}^{\text{I}})(\text{HL}^{\text{I}})$ .
